# Supplementary material
Source: PubMed Central journal article supplement (PMC3195939)
Supplement: NIHMS322801-supplement-01.pdf [file NIHMS322801-supplement-01.pdf]

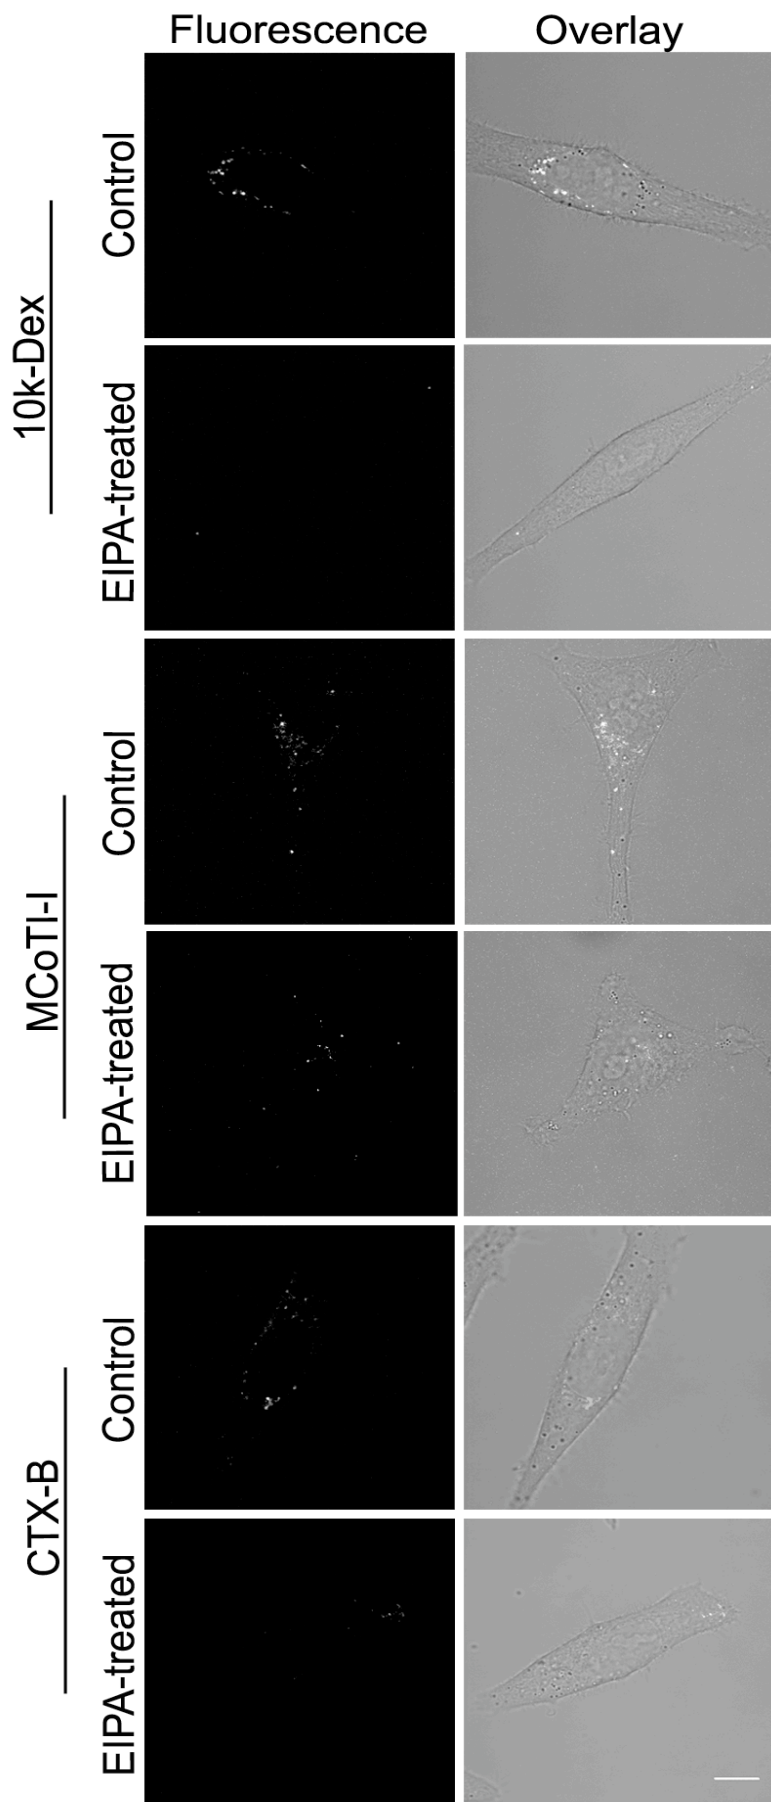

**Supplemental Figure 1.** HeLa cells were untreated (control) or treated with EIPA (50  $\mu$ M) for 30 min at 37°C prior to addition of either 10K-Dex (1 mg/ml), MCoTI-I (25  $\mu$ M), or CTX-B (10  $\mu$ g/ml). Following uptake for 1 hr at 37°C, the cells were imaged using confocal fluorescence microscopy. Bar = 10  $\mu$ m.
